# Supplementary material for: Trp53 controls chondrogenesis and endochondral ossification by negative regulation of TAZ activity and stability via β-TrCP-mediated ubiquitination
Source: PubMed Central journal article supplement (PMC9279315; doi:10.1038/s41420-022-01105-2), 2022-07-12

Original western blots

Fig. 1E

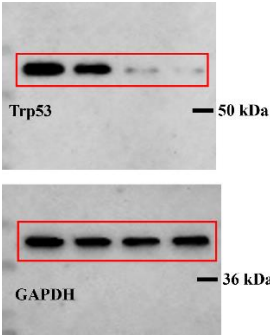

Fig. 5C

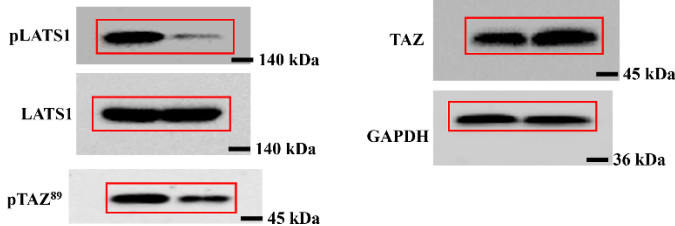

Fig. 5D

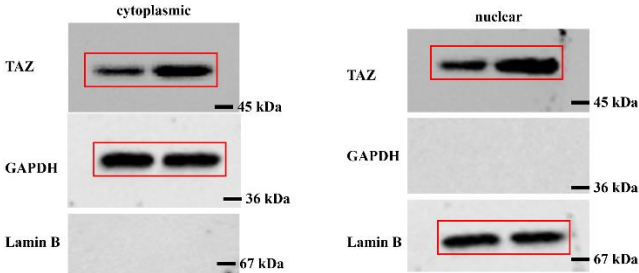

**Fig. 5H**

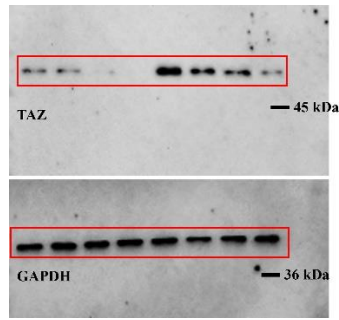

**Fig. 5I**

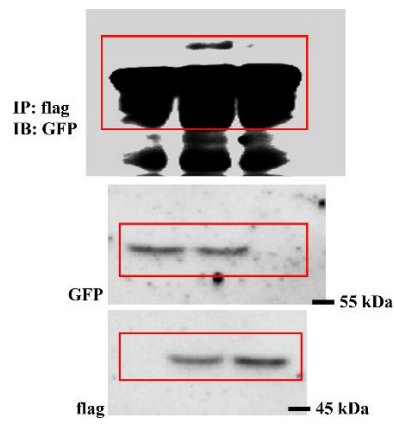

**Fig. 5J**

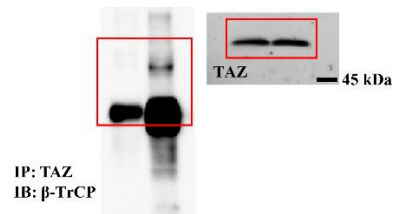

**Fig. 5K**

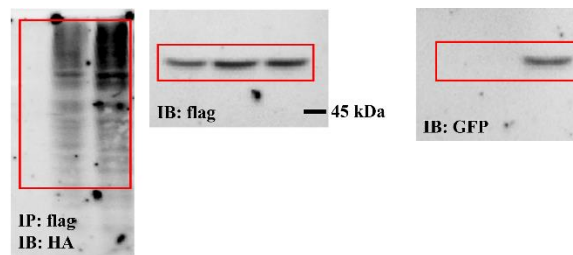

**Fig. S1C**

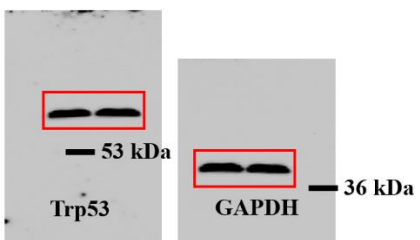

Supplement: 41420_2022_1105_MOESM2_ESM.pdf [file 41420_2022_1105_MOESM2_ESM.pdf]
